# Supplementary material
Source: publisher figshare collection journal article supplement (https://acs.figshare.com/ndownloader/files/4620739)

## Supporting information

### Lennard-Jones potential

The general form of the Lennard-Jones potential between atom i and atom j is given by:

$$V_{ij} = \frac{A_{ij}}{r_{ij}^{12}} - \frac{B_{ij}}{r_{ij}^6}$$

In which  $A_{ij}$  and  $B_{ij}$  are calculated by the following expressions:

$$A_{ij} = \sqrt{A_i A_j}$$

$$B_{ij} = \sqrt{B_i B_j}$$

All Lennard-Jones potentials have been applied with a cut-off from 0 to 40 Å, except for the C<sub>sp3</sub> – O Lennard-Jones potentials which is applied between 2 and 40 Å to avoid interference with the bond describing Morse potential.

The following parameters A and B have been used:

| atom              | A (eV Å <sup>12</sup> ) | B (eV Å <sup>6</sup> ) |
|-------------------|-------------------------|------------------------|
| C <sub>sp3</sub>  | 77636.68281260          | 22.91719173            |
| C <sub>sp2</sub>  | 128737.36099524         | 57.48815803            |
| C <sub>arom</sub> | 128737.36099524         | 57.48815803            |
| H                 | 308.25289998            | 1.42541402             |
| Si                | 136561.43622211         | 30.78857787            |
| Al                | 136561.43622211         | 30.78857787            |
| O                 | 11833.86243143          | 21.63347716            |

## Overview of the potentials added to the zeolite force field and the applied cut-off distances

### 1. Morse potential

$$E_{Morse} = D_e \left[ \left( 1 - \exp(-a(r - r_0)) \right)^2 - 1 \right]$$

| Bonds (Morse)*                       | $D_e$ (eV) | $a$ ( $\text{\AA}^{-1}$ ) | $r_0$ ( $\text{\AA}$ ) | cut-off ( $\text{\AA}$ ) |
|--------------------------------------|------------|---------------------------|------------------------|--------------------------|
| H–C                                  | 1.4284     | 2.2707                    | 1.1172                 | 0.0 – 1.5                |
| C <sub>sp2</sub> –C <sub>sp2</sub>   | 1.9947     | 2.5977                    | 1.3271                 | 0.0 – 2.0                |
| C <sub>sp3</sub> –C                  | 1.4262     | 2.2722                    | 1.4814                 | 0.0 – 2.0                |
| C <sub>arom</sub> –C <sub>arom</sub> | 1.5206     | 2.3718                    | 1.4009                 | 0.0 – 2.0                |
| C <sub>sp3</sub> –O                  | 0.9526     | 1.3651                    | 1.8288                 | 0.0 – 2.0                |

\* If the carbon atom type is not specified (“C”), the respective potential function applies for any combination of the three types of carbon atoms (C<sub>sp2</sub>, C<sub>sp3</sub> and C<sub>arom</sub>)

### 2. Three-Body potential

$$E_{Three-Body} = \frac{1}{2} k (\theta - \theta_0)^2$$

| Angle (Three-Body)*<br>at2 – at1 – at3 ** | $k$ (eV rad <sup>-2</sup> ) | $\theta_0$ (degrees) | cut-off ( $\text{\AA}$ )** |           |           |
|-------------------------------------------|-----------------------------|----------------------|----------------------------|-----------|-----------|
|                                           |                             |                      | $r_{12}$                   | $r_{13}$  | $r_{23}$  |
| H–C <sub>sp2</sub> –H                     | 1.0074                      | 120.00               | 0.0 – 1.5                  | 0.0 – 1.5 | 0.0 – 4.0 |
| H–C <sub>sp2</sub> –C                     | 1.6048                      | 120.00               | 0.0 – 1.5                  | 0.0 – 2.0 | 0.0 – 4.0 |
| C–C <sub>sp2</sub> –C                     | 1.7965                      | 120.00               | 0.0 – 2.0                  | 0.0 – 2.0 | 0.0 – 4.0 |
| H–C <sub>sp3</sub> –H                     | 1.1704                      | 109.47               | 0.0 – 1.5                  | 0.0 – 1.5 | 0.0 – 4.0 |
| H–C <sub>sp3</sub> –C                     | 1.5839                      | 109.47               | 0.0 – 1.5                  | 0.0 – 2.0 | 0.0 – 4.0 |
| C–C <sub>sp3</sub> –C                     | 2.2766                      | 109.47               | 0.0 – 2.0                  | 0.0 – 2.0 | 0.0 – 4.0 |
| H–C <sub>arom</sub> –C <sub>arom</sub>    | 1.4335                      | 120.00               | 0.0 – 1.5                  | 0.0 – 2.0 | 0.0 – 4.0 |
| C–C <sub>arom</sub> –C <sub>arom</sub>    | 1.7782                      | 120.00               | 0.0 – 2.0                  | 0.0 – 2.0 | 0.0 – 4.0 |
| C–C <sub>sp3</sub> –O                     | 1.9585                      | 109.47               | 0.0 – 2.0                  | 0.0 – 2.0 | 0.0 – 4.0 |

\* If the carbon atom type is not specified (“C”), the respective potential function applies for any combination of the three types of carbon atoms (C<sub>sp2</sub>, C<sub>sp3</sub> and C<sub>arom</sub>)

\*\* See Figure below for a clarification of the atom numbers and the cut-off distances

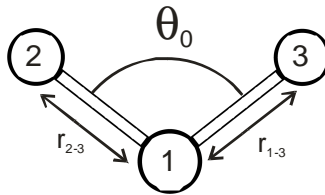

Supplement: Supplementary file 1 [file 4620739]
